# Supplementary material for: A New Prevalent Densovirus Discovered in Acari. Insight from Metagenomics in Viral Communities Associated with Two-Spotted Mite (Tetranychus urticae) Populations
Source: PubMed Central journal article supplement (PMC6466187; doi:10.3390/v11030233), 2019-03-07
Supplement: viruses-11-00233-s001.pdf [file viruses-11-00233-s001.pdf]

Table S1: *Tetranychus* species screened for the presence of TuaDV. In yellow and in green: samples that have been fully and partially sequenced respectively. \* represents species from rearings for more than one year.

| General Information      |               |       | Lab/Field information |                                             |               |                         |        |
|--------------------------|---------------|-------|-----------------------|---------------------------------------------|---------------|-------------------------|--------|
| Species                  | Population    | Form  | Country               | Sampling location                           | Sampling date | Initial number of mites | plant  |
| <i>T. urticae</i> *      | R5            | Green | Netherlands           | Netherlands                                 | 2009          | 300                     | Bean   |
| <i>T. urticae</i> *      | Santpoort 2   | Green | Netherlands           | Santpoort                                   | 2001          | ~250                    | Bean   |
| <i>T. urticae</i> *      | BE            | Green | Belgium               | Ghent                                       | NA            | NA                      | Bean   |
| <i>T. urticae</i> *      | Nice-Valbonne | Green | France                | Nice-Valbonne                               | 2012          | NA                      | Bean   |
| <i>T. urticae</i>        | HFM           | Green | Portugal              | Herdade do Freixo do Meio - Montemor-o-Novo | 2017          | 80                      | Tomato |
| <i>T. urticae</i>        | MON           | Green | Portugal              | Quinta Vidigal - Montemor-o-novo            | 2017          | 150                     | Tomato |
| <i>T. urticae</i>        | ALP           | Green | Portugal              | Agrial - Alpiarça                           | 2017          | 90                      | Tomato |
| <i>T. urticae</i>        | DEF           | Green | Portugal              | Alvalade - Lisbon                           | 2017          | 300                     | Tomato |
| <i>T. urticae</i> *      | AMP           | Red   | Portugal              | Aldeia da Mata Pequena                      | 2017          | 60                      | Bean   |
| <i>T. urticae</i>        | AMP.2         | Red   | Portugal              | Aldeia da Mata Pequena                      | 2017          | 30                      | Bean   |
| <i>T. cinnabarinus</i> * | SB9           | Red   | Crete                 | MIX                                         | 2006          | Selection x females     | Bean   |
| <i>T. cinnabarinus</i> * | SB9.2         | Red   | Crete                 | MIX                                         | 2006          | 100                     | Bean   |
| <i>T. cinnabarinus</i>   | CHA2          | Red   | Portugal              | Lagos                                       | 2017          | 50                      | Tomato |
| <i>T. cinnabarinus</i>   | BF            | Red   | Portugal              | Lourinhã                                    | 2017          | 50                      | Tomato |
| <i>T. cinnabarinus</i>   | PBT           | Red   | Portugal              | Gradil (monte gordo)                        | 2017          | 70                      | Tomato |
| <i>T. cinnabarinus</i>   | LIM           | Red   | Portugal              | Lagoa                                       | 2017          | 500                     | Tomato |
| <i>T. cinnabarinus</i>   | 6M2           | Red   | Portugal              | Chamusca                                    | 2017          | 100                     | Tomato |
| <i>T. evansi</i> *       | BR            | T2    | Brazil                | unknown                                     | 2002          | 300                     | Tomato |
| <i>T. evansi</i> *       | GH            | T1    | Portugal              | Uni Lisbon                                  | NA            | 80                      | Tomato |

|                    |     |    |          |                                           |      |     |        |
|--------------------|-----|----|----------|-------------------------------------------|------|-----|--------|
| <i>T. evansi</i> * | QL  | T1 | Portugal | Quinta das Lameiras                       | 2013 | 500 | Tomato |
| <i>T. evansi</i>   | CG  | T2 | Portugal | C7 (campo grande) - Lisbon                | 2017 | 320 | Tomato |
| <i>T. evansi</i>   | VC  | T2 | Portugal | Parque urbano do vale de Chelas - Lisbon  | 2017 | 80  | Tomato |
| <i>T. evansi</i>   | ER  | T2 | Portugal | Ericeira - Ericeira                       | 2017 | 100 | Tomato |
| <i>T. evansi</i>   | QG  | T1 | Portugal | Quinta da Granja (Colombo) - Lisbon       | 2017 | 180 | Tomato |
| <i>T. evansi</i>   | PBS | T1 | Portugal | Parque da Bensaude (Laranjeiras) - Lisbon | 2017 | 150 | Tomato |
| <i>T. evansi</i>   | 6M1 | T1 | Portugal | Lagos                                     | 2017 | 400 | Tomato |
| <i>T. evansi</i>   | VIT | T1 | Portugal | Vitacress - Alcochete                     | 2017 | 300 | Tomato |

Table S2: Sequences of TuaDV primers.

| Primer name | Primer sequence          | Primer length |
|-------------|--------------------------|---------------|
| 20 F        | GAGCCTTCAACTAGCACAGC     | 20            |
| 61 F        | ACCTGGTGGGAAGCTTACGAC    | 20            |
| 639 R       | GGCATAATTGAAGGCTCGTTCC   | 22            |
| 556 F       | AAACTTTGTACGTGGACAAAAC   | 23            |
| 1,125 F     | AGCAGCATTAGATTGAACAGGT   | 24            |
| 1,203 F     | TCAACTGGACAATCTCAACAACC  | 22            |
| 1,793 R     | ACACTGGTTCAAATAGCTTATGCA | 24            |
| 2,070 R     | TCAAATCTACACGGCTGGTT     | 20            |
| 1,230 R     | TATTGTAATTATCAATTCA      | 20            |
